# Supplementary material
Source: ML conference proceedings conference paper supplement (https://proceedings.neurips.cc/paper_files/paper/2007/hash/c2aee86157b4a40b78132f1e71a9e6f1-Abstract.html)

# Automatic Generation of Social Tags for Music Recommendation (Poster ID M70)

Douglas Eck, Paul Lamere, Thierry Bertin-Mahieux & Stephen Green

- (I) A Boosting-based method for predicting labels such as social tags from audio features
- (II) Generalizes to poorly-tagged or untagged music
- (III) Works on relatively large dataset: millions of data-mined tags / ~100,000 mp3s

Audio and graphic: shortest path through tag space from Beethoven to The Prodigy.

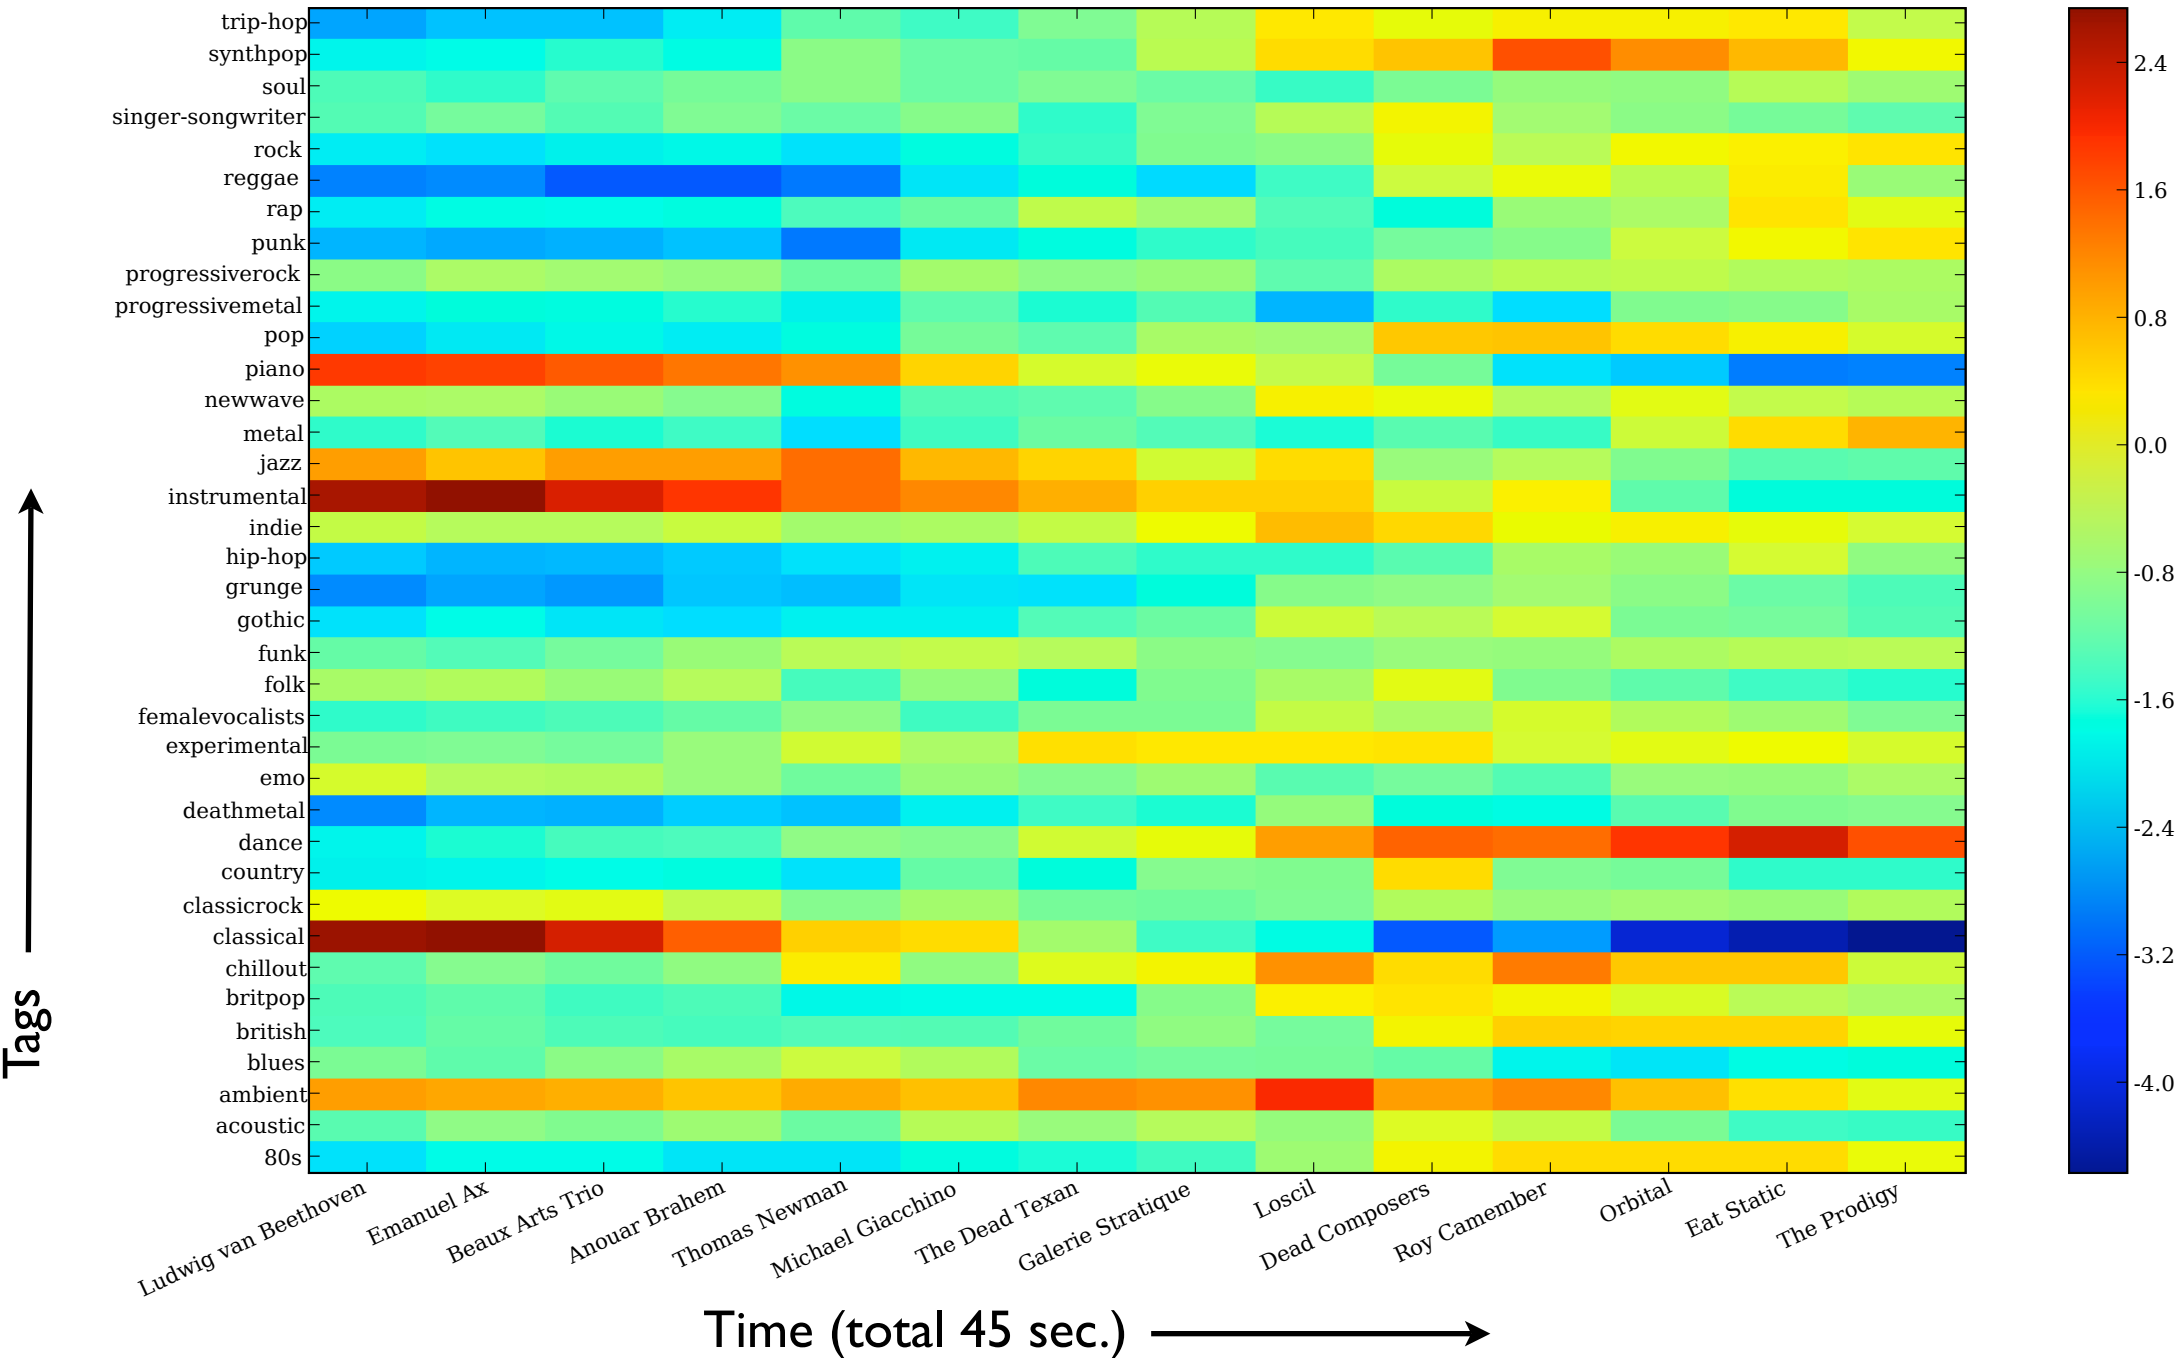

Supplement: Supplementary file [file c2aee86157b4a40b78132f1e71a9e6f1-Supplemental.zip]
