# Supplementary material
Source: ML conference proceedings conference paper supplement (https://proceedings.neurips.cc/paper_files/paper/2007/hash/c2aee86157b4a40b78132f1e71a9e6f1-Abstract.html)
Supplement: Supplementary file [file c2aee86157b4a40b78132f1e71a9e6f1-Supplemental.zip]

---

# Automatic Generation of Social Tags for Music Recommendation (Extra Material)

---

**Douglas Eck\***

Sun Labs, Sun Microsystems  
Burlington, Mass, USA  
douglas.eck@umontreal.ca

**Paul Lamere**

Sun Labs, Sun Microsystems  
Burlington, Mass, USA  
paul.lamere@sun.com

**Thierry Bertin-Mahieux**

Sun Labs, Sun Microsystems  
Burlington, Mass, USA  
bertinmt@iro.umontreal.ca

**Stephen Green**

Sun Labs, Sun Microsystems  
Burlington, Mass, USA  
stephen.green@sun.com

This annex is meant provides some tables and graphics which did not fit in the main 8-page NIPS paper. This document won't make much sense unless it is read along with the paper itself.

## Some statistics about tags mined from Last.FM

| Tag Type        | Frequency | Examples             |
|-----------------|-----------|----------------------|
| Genre           | 68%       | heavy metal, punk    |
| Locale          | 12%       | French, Seattle, NYC |
| Mood            | 5%        | chill, party         |
| Opinion         | 4%        | love, favorite       |
| Instrumentation | 4%        | piano, female vocal  |
| Style           | 3%        | political, humor     |
| Misc            | 3%        | Coldplay, composers  |
| Personal        | 1%        | seen live, I own it  |

Table 1: The distribution of the types of tags for the 500 most frequently applied tags at Last.fm.

---

\*Eck and Bertin-Mahieux currently at Dept. of Computer Science, Univ. of Montreal, Montreal , Canada

| 60 selected tags from Last.fm (total 6590293 tag applications) |                 |                     |                |                  |                |
|----------------------------------------------------------------|-----------------|---------------------|----------------|------------------|----------------|
| 80S                                                            | 65128 (0.99%)   | Alternative         | 366550 (5.56%) | Alternative Rock | 144022 (2.19%) |
| Ambient                                                        | 67834 (1.03%)   | Black Metal         | 90384 (1.37%)  | Blues            | 44364 (0.67%)  |
| British                                                        | 48206 (0.73%)   | Britpop             | 46010 (0.70%)  | Chillout         | 53912 (0.82%)  |
| Classic Rock                                                   | 171529 (2.60%)  | Dance               | 73541 (1.12%)  | Death Metal      | 95745 (1.45%)  |
| Doom Metal                                                     | 30929 (0.47%)   | Electronic          | 247122 (3.75%) | Electronica      | 116782 (1.77%) |
| Emo                                                            | 109985 (1.67%)  | Experimental        | 70555 (1.07%)  | Favorites        | 35806 (0.54%)  |
| Female Vocalists                                               | 136860 (2.08%)  | Folk                | 106730 (1.62%) | Funk             | 38395 (0.58%)  |
| German                                                         | 34245 (0.52%)   | Gothic              | 31538 (0.48%)  | Gothic Metal     | 34350 (0.52%)  |
| Grunge                                                         | 39610 (0.60%)   | Hardcore            | 103291 (1.57%) | Hard Rock        | 94303 (1.43%)  |
| Heavy Metal                                                    | 79631 (1.21%)   | Hip-Hop             | 160607 (2.44%) | Hiphop           | 92389 (1.40%)  |
| Indie                                                          | 393588 (5.97%)  | Indie Pop           | 60155 (0.91%)  | Indie Rock       | 166477 (2.53%) |
| Industrial                                                     | 84430 (1.28%)   | Instrumental        | 44823 (0.68%)  | Japanese         | 64960 (0.99%)  |
| Jazz                                                           | 105152 (1.60%)  | Melodic Death Metal | 48753 (0.74%)  | Metal            | 249553 (3.79%) |
| Metalcore                                                      | 58249 (0.88%)   | Newwave             | 39981 (0.61%)  | Pop              | 211833 (3.21%) |
| Post-Punk                                                      | 34352 (0.52%)   | Post-Rock           | 50936 (0.77%)  | Power Metal      | 51625 (0.78%)  |
| Progressive Metal                                              | 51044 (0.77%)   | Progressive Rock    | 79470 (1.21%)  | Punk             | 182593 (2.77%) |
| Punk Rock                                                      | 82083 (1.25%)   | Rap                 | 109179 (1.66%) | Reggae           | 40664 (0.62%)  |
| Rock                                                           | 659670 (10.01%) | Screamo             | 40665 (0.62%)  | Seen Live        | 490504 (7.44%) |
| Singer-Songwriter                                              | 123163 (1.87%)  | Ska                 | 39000 (0.59%)  | Soul             | 46695 (0.71%)  |
| Soundtrack                                                     | 45209 (0.69%)   | Thrash Metal        | 55955 (0.85%)  | Trip-Hop         | 49179 (0.75%)  |

Table 2: Statistics on the tags we data-mined from Last.fm. “# Artists” indicates the number of artists for which this tag was the most frequent.

## Visualization

Here is a projection of the booster weights for the tags “rock” and “electronic”. No adjustment of tag magnitudes was made. Only a few artists are shown.

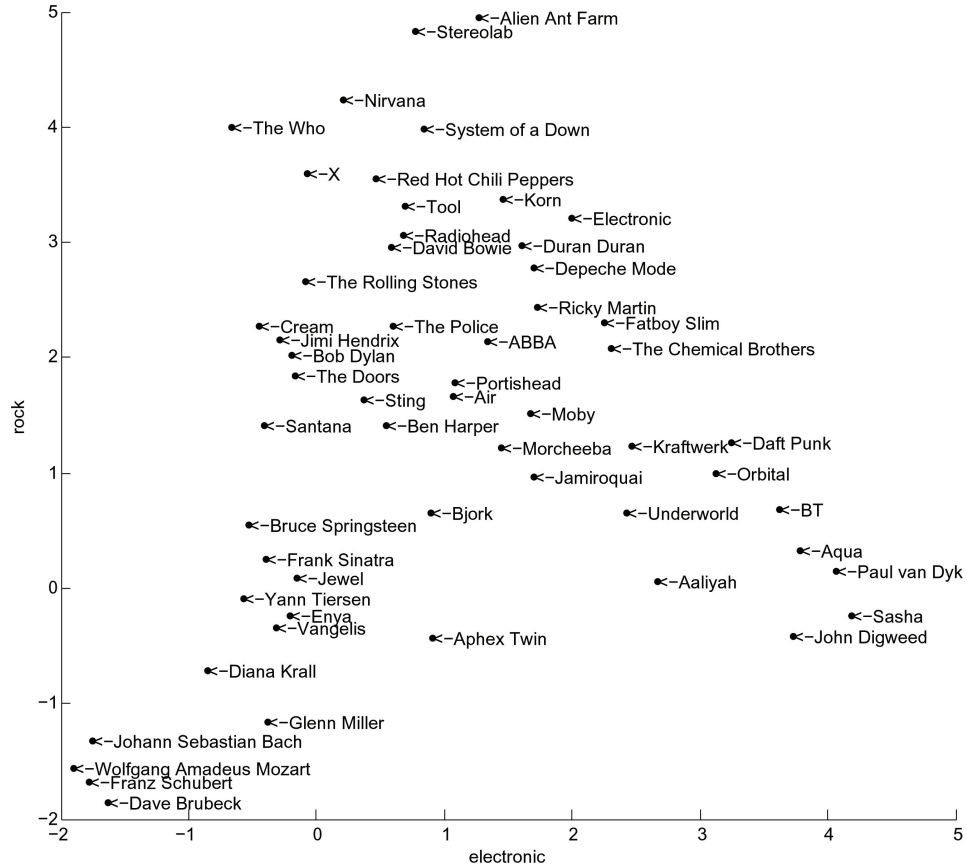

Figure 1: “rock” versus “electronic” for several artists.

### Breakdown of learning error rates by tag

| Summary of error rates for selected boosters |          |       |                     |          |       |
|----------------------------------------------|----------|-------|---------------------|----------|-------|
| Tags                                         | Segments | Songs | Tags                | Segments | Songs |
| 80s                                          | 45.2     | 42.1  | indie               | 49.6     | 45.4  |
| alternative                                  | 45.8     | 41.5  | indie pop           | 45.3     | 42.5  |
| alternative rock                             | 45.7     | 43.1  | indie rock          | 48.3     | 45.1  |
| ambient                                      | 42.3     | 38.5  | industrial          | 39.6     | 36.8  |
| black metal                                  | 21.3     | 17.8  | instrumental        | 31.0     | 27.2  |
| blues                                        | 46.2     | 42.5  | japanese            | 39.2     | 37.3  |
| british                                      | 42.1     | 39.5  | jazz                | 43.0     | 40.0  |
| britpop                                      | 47.3     | 45.4  | melodic death metal | 22.8     | 19.2  |
| chillout                                     | 46.0     | 42.9  | metal               | 43.4     | 39.2  |
| classic rock                                 | 47.6     | 43.5  | metal core          | 35.2     | 30.8  |
| dance                                        | 41.2     | 38.1  | new wave            | 47.1     | 44.1  |
| death metal                                  | 29.5     | 26.1  | pop                 | 49.4     | 46.2  |
| doom metal                                   | 43.31    | 39.57 | post punk           | 43.2     | 40.1  |
| electronic                                   | 48.7     | 45.1  | post rock           | 34.4     | 32.3  |
| electronica                                  | 44.5     | 35.15 | power metal         | 25.0     | 20.7  |
| emo                                          | 42.2     | 38.8  | progressive metal   | 30.2     | 26.1  |
| experimental                                 | 48.7     | 46.4  | progressive rock    | 46.0     | 43.1  |
| favorites                                    | 46.29    | 42.48 | punk                | 47.5     | 45.2  |
| female vocalists                             | 44.1     | 40.1  | punk rock           | 44.3     | 41.4  |
| folk                                         | 46.0     | 42.6  | rap                 | 37.1     | 35.2  |
| funk                                         | 46.6     | 43.3  | reggae              | 30.9     | 28.2  |
| german                                       | 24.2     | 20.9  | rock                | 43.0     | 39.4  |
| gothic                                       | 34.6     | 31.3  | screamo             | 37.7     | 33.9  |
| gothic metal                                 | 36.3     | 32.2  | seen live           | 45.7     | 42.8  |
| grunge                                       | 42.6     | 39.2  | singer songwriter   | 48.2     | 45.0  |
| hard core                                    | 38.6     | 35.8  | ska                 | 35.0     | 31.4  |
| hard rock                                    | 46.4     | 44.0  | soul                | 49.4     | 46.6  |
| heavy metal                                  | 30.1     | 27.0  | soundtrack          | 42.5     | 39.8  |
| hip-hop                                      | 42.5     | 40.5  | thrash metal        | 36.6     | 32.4  |
| hiphop                                       | 35.6     | 31.9  | trip-hop            | 43.7     | 41.8  |

Table 3: Test error (%) on predicting bins for songs and segments. Note that classical has only 2 bins. All boosters used 2000 single-stump weak learners.

| Ground truth                 | Social                       | Auto                        |
|------------------------------|------------------------------|-----------------------------|
| The Beatles                  |                              |                             |
| Radiohead                    | The Zombies                  | Rolling Stones              |
| Rolling Stones               | The Lovin' Spoonful          | Queen                       |
| Led zeppelin                 | Elvis Presley                | Donovan                     |
| Pink Floyd                   | The Who                      | Billy Joel                  |
| David Bowie                  | Fleetwood Mac                | Traffic                     |
| The Who                      | Rolling Stones               | Los Lobos                   |
| Coldplay                     | George Harrison              | The Doors                   |
| White Stripes                | Queen                        | The Band                    |
| Beck                         | John Lennon & Yoko Ono       | Stevie Ray Vaughn           |
| Red Hot Chili Peppers        | The Doors                    | The Lovin' Spoonful         |
| Wilco                        |                              |                             |
| Sufjan Stevens               | Sparklehorse                 | Kelley Stoltz               |
| Elliott Smith                | Silver Jews                  | John Cale                   |
| The Flaming Lips             | Calexico                     | John Linnell                |
| The Shins                    | Grandaddy                    | Lloyd Cole                  |
| Modest Mouse                 | Clem Snide                   | Son Volt                    |
| Pavement                     | Brian Jonestown Massacre     | Blonde Redhead              |
| Beck                         | Modest Mouse                 | The Delgados                |
| Radiohead                    | Sebadoh                      | Death Cab for Cutie         |
| New Pornographers            | Malajube                     | Gomez                       |
| The Beatles                  | Mercury Rev                  | Mark Knopfler               |
| Bob Dylan                    |                              |                             |
| The Band                     | Flying Burrito Brothers      | Townes Van Zandt            |
| Woody Guthrie                | Don McLean                   | Crosby, Still & Nash        |
| Grateful Dead                | Crosby, Still, Nash & Young  | Traffic                     |
| Rolling Stones               | Buffalo Springfield          | The Band                    |
| Johnny Cash                  | The Youngbloods              | Emerson, Lake & Palmer      |
| Tom Waits                    | Johnny Cash Massacre         | The Lovin' Spoonful         |
| The Beatles                  | The Band                     | Crosby, Still, Nash & Young |
| Crosby, Stills, Nash & Young | Warren Zevon                 | Johnny Cash                 |
| George Harrison              | Crosby, Still & Nash         | Tom Paxton                  |
| Townes Van Zandt             | Jerry Garcia & David Grisman | Howlin' Wolf                |
| Ella Fitzgerald              |                              |                             |
| Sarah Vaughan                | Sarah Vaughan                | Anita O'Day                 |
| Billie Holiday               | Dinah Washington             | Sarah Vaughan               |
| Duke Ellington               | Diana Krall                  | Betty Carter                |
| Dinah Washington             | Billie Holiday               | Doris Day                   |
| Count Basie                  | Betty Carter                 | Gerry Mulligan              |
| Louis Armstrong              | Stacey Kent                  | Charles Mingus              |
| Nina Simone                  | Peggy Lee                    | Stan Getz                   |
| Chet Baker                   | Shirley Horn                 | Clifford Brown              |
| Frank Sinatra                | Madeleine Peyroux            | Ben Webster                 |
| Diana Krall                  | Patricia Barber              | Etta James                  |
| Aqua                         |                              |                             |
| Britney Spears               | Elvis Crespo                 | Ministry of Sound           |
| Madonna                      | Lou Bega                     | La Bouche                   |
| Eiffel 65                    | Madonna                      | Jennifer Lopez              |
| Avril Lavigne                | Britney Spears               | Supreme Beings of Leisure   |
| Evanescence                  | Jennifer Lopez               | Olive                       |
| Shakira                      | ABBA                         | Sven Vath                   |
| "Weird Al" Yankovic          | Cher                         | Judge Jules                 |
| ABBA                         | Janet Jackson                | M.I.A.                      |
| Black Eyed Peas              | Gloria Estefan               | Cher                        |
| Enya                         | Roger Whittaker              | dZihan & Kamien             |

Table 4: Close artists for our 3 similarity matrices: ground truth (TF/IDF on Last.fm user data), from social tags, and from autotags
